# Supplementary material for: Talniflumate abrogates mucin immune suppressive barrier improving efficacy of gemcitabine and nab-paclitaxel treatment in pancreatic cancer
Source: Springer Nature journal article supplement (doi:10.1186/s12967-023-04733-z), 2023-11-23

**a** Low-grade IPMN

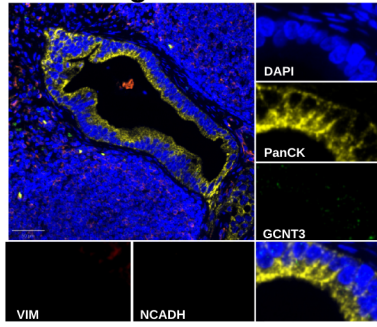

High-grade IPMN

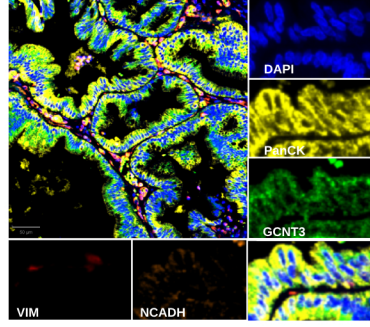

PDAC pN0

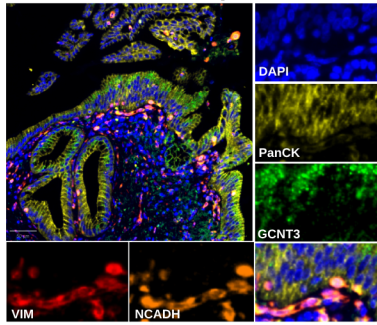

PDAC pN2

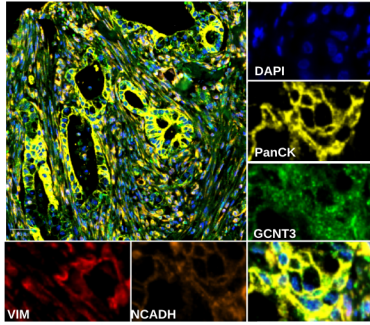

pN2 matched Metastasis

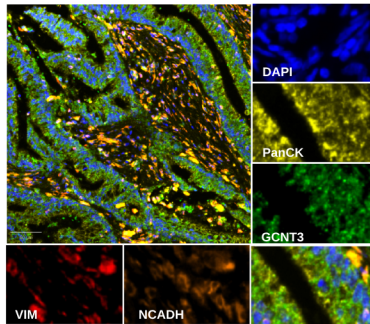

**b**

Low-grade IPMN

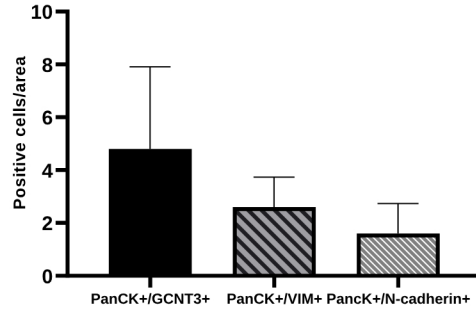

High-grade IPMN

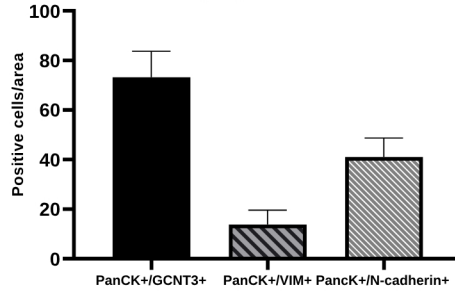

PDAC pN0

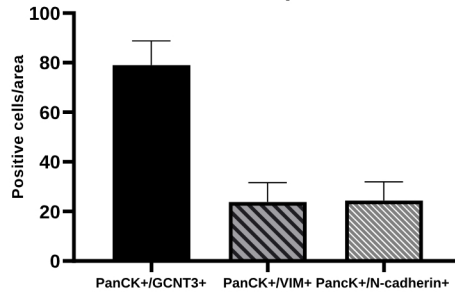

PDAC pN2

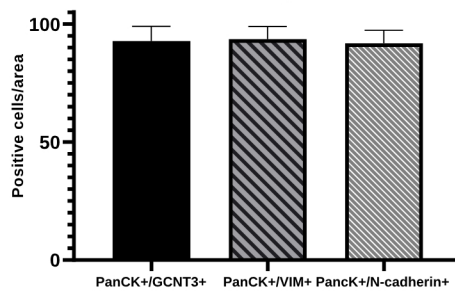

pN2 matched Metastasis

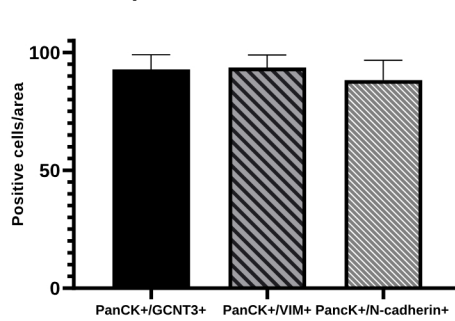

Supplement: MOESM1 [file 26349594]
