# Supplementary material for: Talniflumate abrogates mucin immune suppressive barrier improving efficacy of gemcitabine and nab-paclitaxel treatment in pancreatic cancer
Source: Springer Nature journal article supplement (doi:10.1186/s12967-023-04733-z), 2023-11-23

**CTR**

**TALN**

**Gem/Txl**

**COMBO**

**H&E**

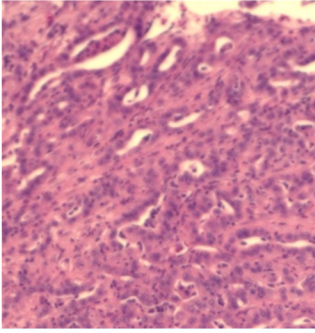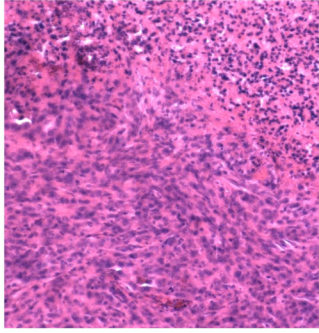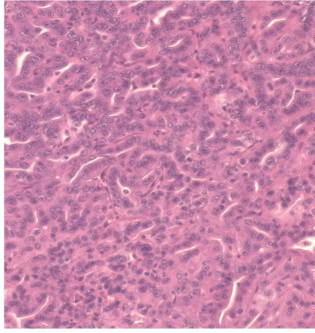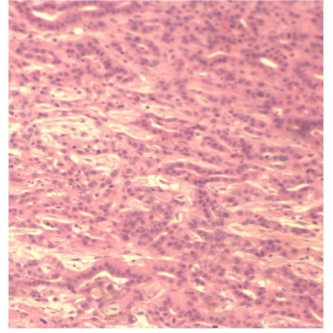

**Mucicarmine**

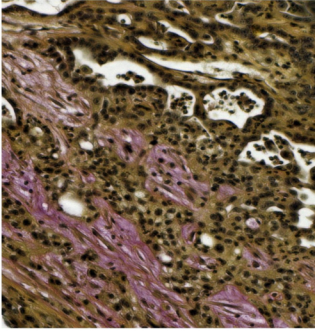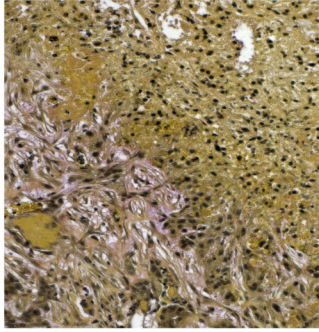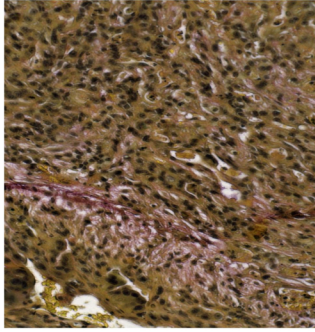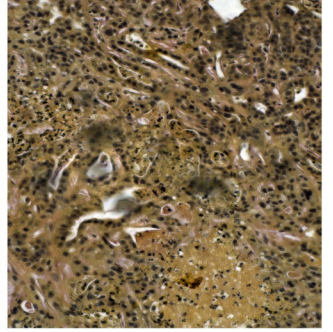

Supplement: MOESM5 [file 26349594]
